# Supplementary material for: Site-selective unidirectional benzylic sp3 C–H oxidation of dodecahydrotriphenylene with RuCl3–NaIO4: formation of benzylic ketones
Source: Royal Society of Chemistry journal article supplement (doi:10.1039/d1ra06897k), 2021-01-01
Supplement: d1ra06897k1.pdf [file d1ra06897k1.pdf]

## **Electronic Supporting Information (ESI)**

### **SITE-SELECTIVE UNIDIRECTIONAL BENZYLIC $sp^3$ C-H OXIDATION OF DODECAHYDROTRIPHENYLENE WITH $RuCl_3 - NaIO_4$ : FORMATION OF BENZYLIC KETONES**

Gaurang Bhatt,<sup>a</sup> Pradeep T Deota,<sup>\*a</sup> Deepak Upadhyay<sup>b</sup> and Prafulla K. Jha<sup>c</sup>

<sup>a</sup>Applied Chemistry Department, Faculty of Technology & Engineering, The Maharaja Sayajirao University of Baroda, Vadodara-390 001, Gujarat, India

<sup>b</sup>Department of Applied Physics, Faculty of Technology & Engineering, The Maharaja Sayajirao University of Baroda, Vadodara-390 001, Gujarat, India

<sup>c</sup>Department of Physics, Faculty of Science, The Maharaja Sayajirao University of Baroda, Vadodara-390 001, Gujarat, India

\*Corresponding authors' e-mail: [ptdeota-appchem@msubaroda.ac.in](mailto:ptdeota-appchem@msubaroda.ac.in) or [deotapt@yahoo.com](mailto:deotapt@yahoo.com) (Prof P T Deota).

### **TABLE OF CONTENTS**

| <b>Section</b> | <b>Contents</b>                                           |
|----------------|-----------------------------------------------------------|
| 1.             | Experimental procedures with spectral data                |
| 2.             | $^1H$ , $^{13}C$ NMR and HRMS spectra                     |
| 3.             | Optimized atomic coordinates of compounds in Angstrom (Å) |
| 4.             | References associated with SI                             |

## SECTION 1 EXPERIMENTAL PROCEDURES WITH SPECTRAL DATA

### Experimental Procedures:

#### General Information

All the chemicals were purchased from Sigma Aldrich, Spectrochem and SD Fine-Chem Limited. Gift samples of  $\text{RuCl}_3$  were received from Hindustan Platinum Pvt. Ltd, Navi Mumbai and Heraeus Pvt Ltd, Jaipur. All solvents were distilled prior to use and stored on oven dried molecular sieves. All the compounds were purified by column chromatography using Acme silica gel (60-120 mesh). Thin Layer Chromatography was performed on silica gel aluminium plates. The spots were visualized under UV light or with iodine vapour. IR spectra were recorded on a SHIMADZU FTIR-245068 spectrophotometer over KBr pellets. Bruker Avance 600 MHz NMR was used to record  $^1\text{H}$  &  $^{13}\text{C}$  NMR spectra. HRMS data of final compounds were recorded in XEVO G2-XS QTOF Mass Spectrometer from IIT Ropar.

#### Typical procedure for the synthesis of dodecahydrotriphenylene (3)

Compound **3** was prepared following the literature procedure <sup>1</sup> as follows. A mixture of  $\text{ZrCl}_4$  (46.40 mmol, 10.8 g) and cyclohexanone (1160.00 mmol, 120.0 mL) was taken in a round-bottomed flask (250 mL) equipped with a condenser. The reaction mixture was refluxed for 10 h after which the reaction mixture became semisolid. Chloroform was added to the reaction mixture and then it was filtered to remove the inorganic material. The filtrate was concentrated under reduced pressure and ethanol was added to the residue and then it was filtered and washed with ethanol several times. The precipitate was collected and dried to give a white powder (56.83 g, 62%). The white powder was further purified by recrystallization with  $\text{CHCl}_3/\text{EtOH}$ , mp 231 °C.<sup>1</sup>

#### General procedure of $\text{RuCl}_3$ - $\text{NaIO}_4$ oxidation

A solution of ruthenium trichloride (125.0 mg, 0.60 mmol) in a mixture of acetonitrile and carbon tetrachloride (50.0 mL each) was added to a stirred mixture of sodium

metaperiodate (80.2 g, 375.00 mmol) in distilled water (100.0 mL). To this mixture, dodecahydrotriphenylene **3** (5.0 g, 20.83 mmol) was added and the reaction mixture was left at room temperature with vortex stirring for 30 h. After completion of reaction (TLC), the reaction mixture was filtered, and the filtrate was extracted with ethyl acetate (3 x 60 mL). The combined organic extracts were washed with water (50 mL) and brine (50 mL), dried over anhydrous sodium sulphate. Removal of solvent under reduced pressure furnished a dark brown thick liquid which was chromatographed on a column of silica gel using light petroleum and ethyl acetate.

#### 3,4,5,6,7,8,9,10,11,12-decahydrotriphenylen-1(2H)-one (**4**)

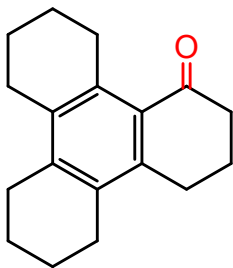

White solid; 1.05 g, 19%, mp 225 °C<sup>2</sup>, IR (KBr cm<sup>-1</sup>): 2918, 2857, 1674; <sup>1</sup>H NMR (600 MHz, CDCl<sub>3</sub>) δ 3.13 (t, *J* = 6.0 Hz, 1H), 2.78 (t, *J* = 5.9 Hz, 1H), 2.59 (dd, *J* = 14.3, 7.5 Hz, 4H), 2.08 (dd, *J* = 12.8, 6.5 Hz, 1H), 1.84 – 1.66 (m, 4H); <sup>13</sup>C NMR (151 MHz, CDCl<sub>3</sub>) δ 201.21, 141.37, 141.16, 137.13, 134.53, 132.23, 129.63, 41.00, 29.70, 27.69, 27.35, 27.24, 26.91, 23.10, 22.77, 22.70, 22.66, 22.53; HRMS (EI): *m/z* calculated for C<sub>18</sub>H<sub>23</sub>O: 255.1749, found 255.1748.

#### 3,4,7,8,9,10,11,12-octahydrotriphenylene-1,5(2H,6H)-dione (**5**)

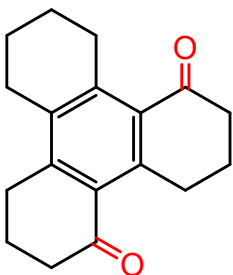

Light yellow solid; 0.52 g, 10%, mp 215 °C, IR (KBr,  $\text{cm}^{-1}$ ): 2934, 2863, 1684;  $^1\text{H}$  NMR (600 MHz,  $\text{CDCl}_3$ )  $\delta$  3.29 (t,  $J = 6.0$  Hz, 2H), 3.16 (t,  $J = 6.2$  Hz, 2H), 2.83 (q,  $J = 5.9$  Hz, 3H), 2.63 (dt,  $J = 14.3, 6.1$  Hz, 7H), 2.15 – 2.08 (m, 3H), 2.00 – 1.94 (m, 2H), 1.81 (dd,  $J = 11.5, 5.6$  Hz, 2H);  $^{13}\text{C}$  NMR (151 MHz,  $\text{CDCl}_3$ )  $\delta$  200.98, 200.64, 148.11, 144.95, 134.33, 131.79, 129.67, 40.71, 40.51, 30.36, 29.40, 29.18, 27.62, 27.47, 22.76, 22.61, 22.43, 22.07; HRMS (ESI):  $m/z$  calculated for  $\text{C}_{18}\text{H}_{21}\text{O}_2$ : 269.1542, found 269.1521.

**3,4,7,8,11,12-hexahydrotriphenylene-1,5,9(2H,6H,10H)-trione (6)**

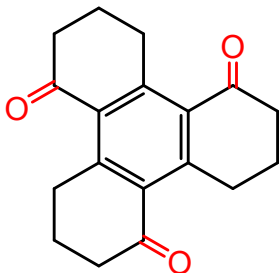

Pale yellow solid; 0.46 g, 8%, mp 210 °C, IR (KBr,  $\text{cm}^{-1}$ ): 2868, 1690;  $^1\text{H}$  NMR (600 MHz,  $\text{CDCl}_3$ )  $\delta$  3.33 (t,  $J = 6.1$  Hz, 1H), 2.68 (t,  $J = 6.8$  Hz, 1H), 2.05 – 1.99 (m, 1H);  $^{13}\text{C}$  NMR (151 MHz,  $\text{CDCl}_3$ )  $\delta$  200.12, 151.60, 131.79, 40.32, 29.81, 22.44; HRMS (ESI):  $m/z$  calculated for  $\text{C}_{18}\text{H}_{19}\text{O}_3$ : 283.1334, found 283.1320.

## SECTION 2 $^1\text{H}$ , $^{13}\text{C}$ NMR AND HRMS SPECTRA

### $^1\text{H}$ NMR of 3,4,5,6,7,8,9,10,11,12-decahydrotriphenylen-1(2H)-one (4)

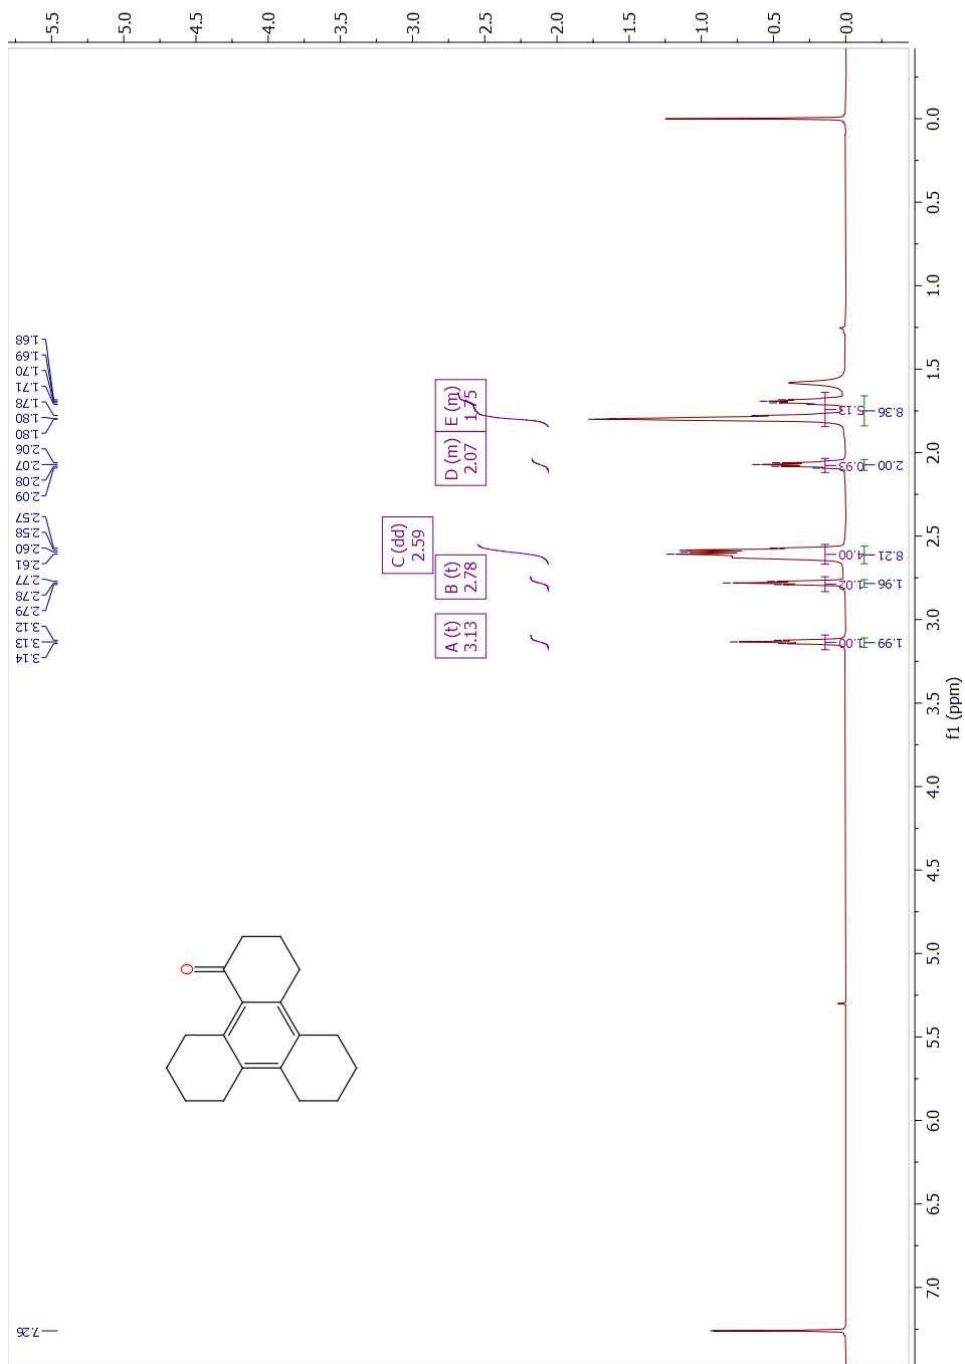

**<sup>13</sup>C NMR of 3,4,5,6,7,8,9,10,11,12-decahydrotriphenylen-1(2H)-one (4)**

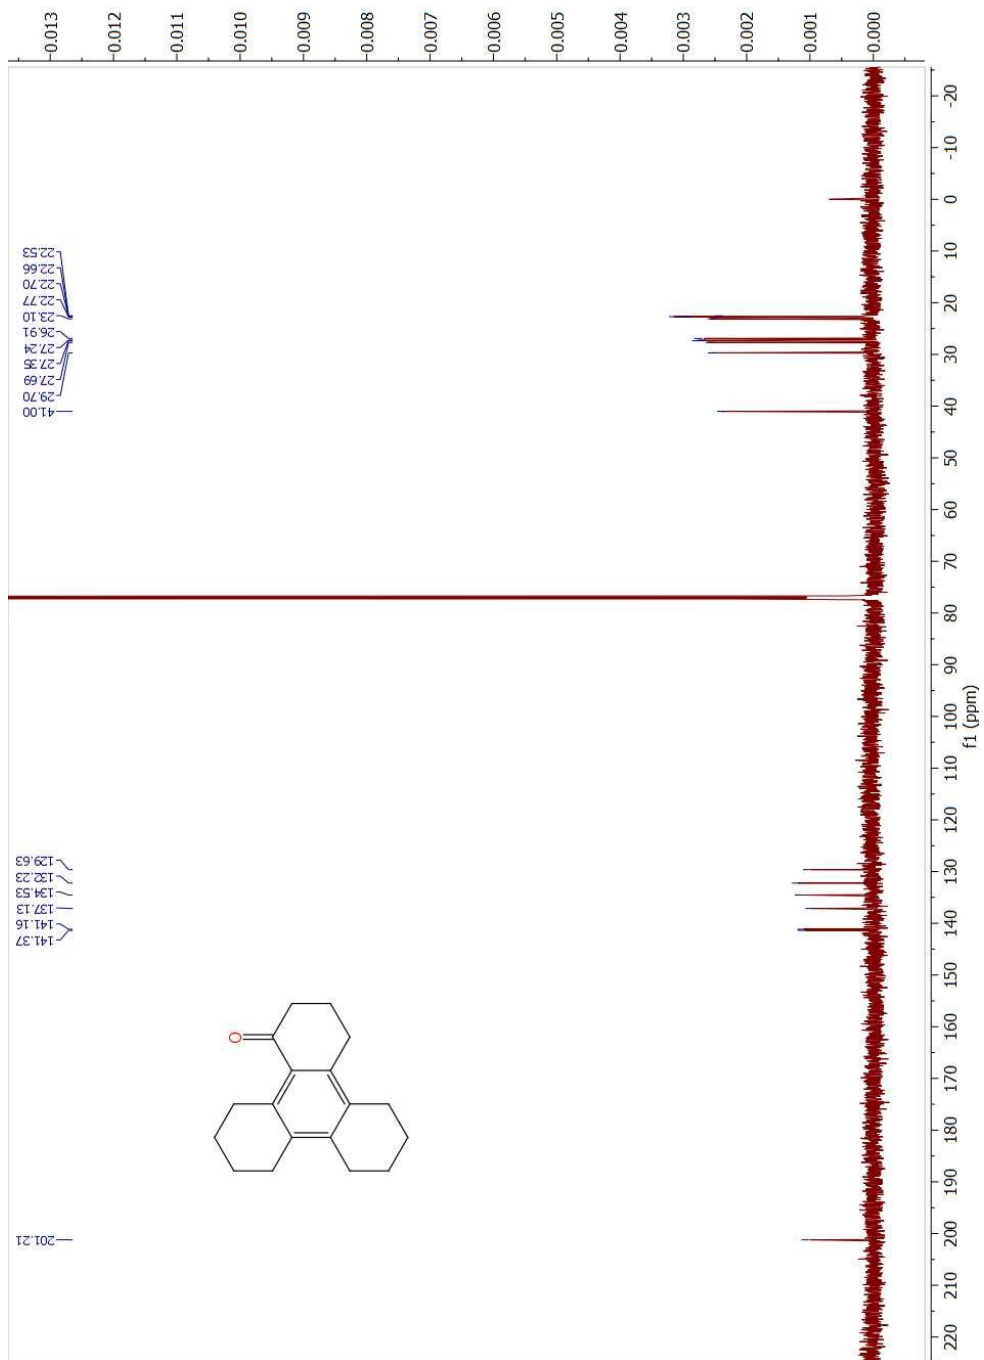

41.00  
29.70  
27.69  
27.35  
27.24  
26.91  
23.10  
22.77  
22.70  
22.66  
22.53

141.37  
141.16  
137.13  
134.53  
132.23  
129.63

201.21

# HRMS of 3,4,5,6,7,8,9,10,11,12-decahydrotriphenylen-1(2H)-one (4)

Monoisotopic Mass, Even Electron Ions

72 formula(e) evaluated with 1 results within limits (up to 50 best isotopic matches for each mass)

Elements Used:

C: 11-25 H: 10-30 N: 0-2 O: 0-8 Na: 0-1

Sample Name : GB026

Test Name : HRMS-1

020320-GB026 93 (0.883)

IITRPR

XEVO G2-XS QTOF

1: TOF MS ES+  
1.72e+008

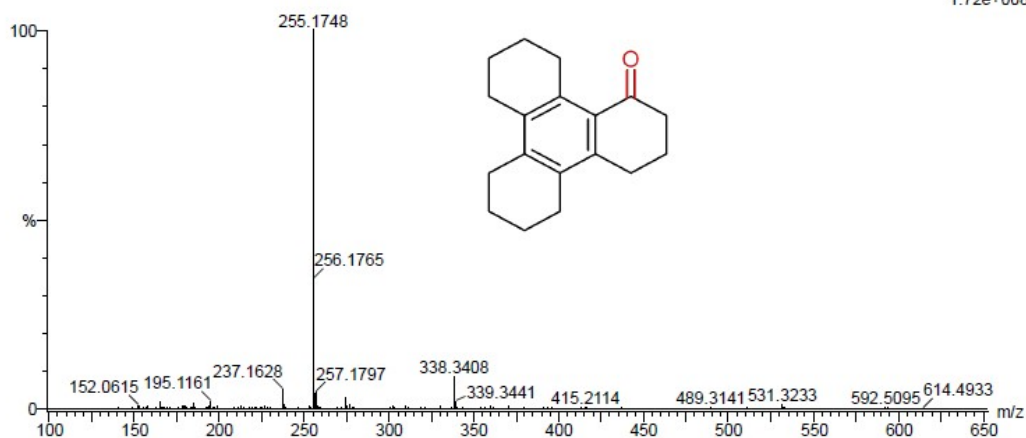

Minimum: -1.5  
Maximum: 5.0 5.0 50.0

| Mass     | Calc. Mass | mDa  | PPM  | DBE | i-FIT  | Norm | Conf(%) | Formula   |
|----------|------------|------|------|-----|--------|------|---------|-----------|
| 255.1748 | 255.1749   | -0.1 | -0.4 | 7.5 | 2329.6 | n/a  | n/a     | C18 H23 O |

**<sup>1</sup>H NMR of 3,4,7,8,9,10,11,12-octahydrotriphenylene-1,5(2H,6H)-dione (5)**

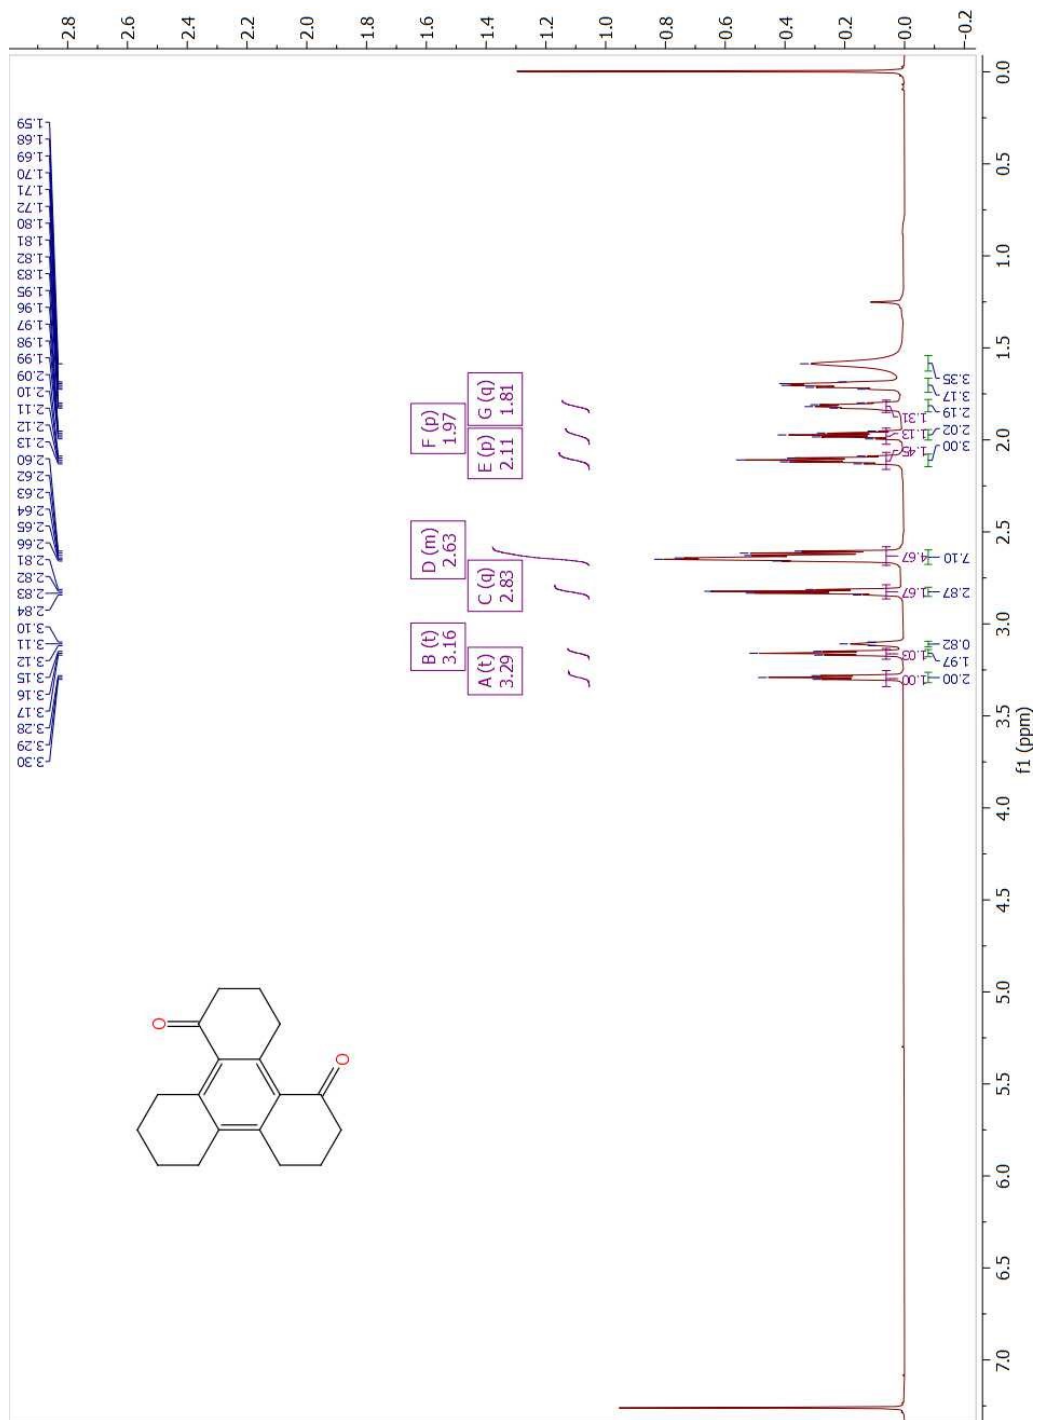



**$^{13}\text{C}$  NMR of 3,4,7,8,9,10,11,12-octahydrotriphenylene-1,5(2H,6H)-dione (5)**

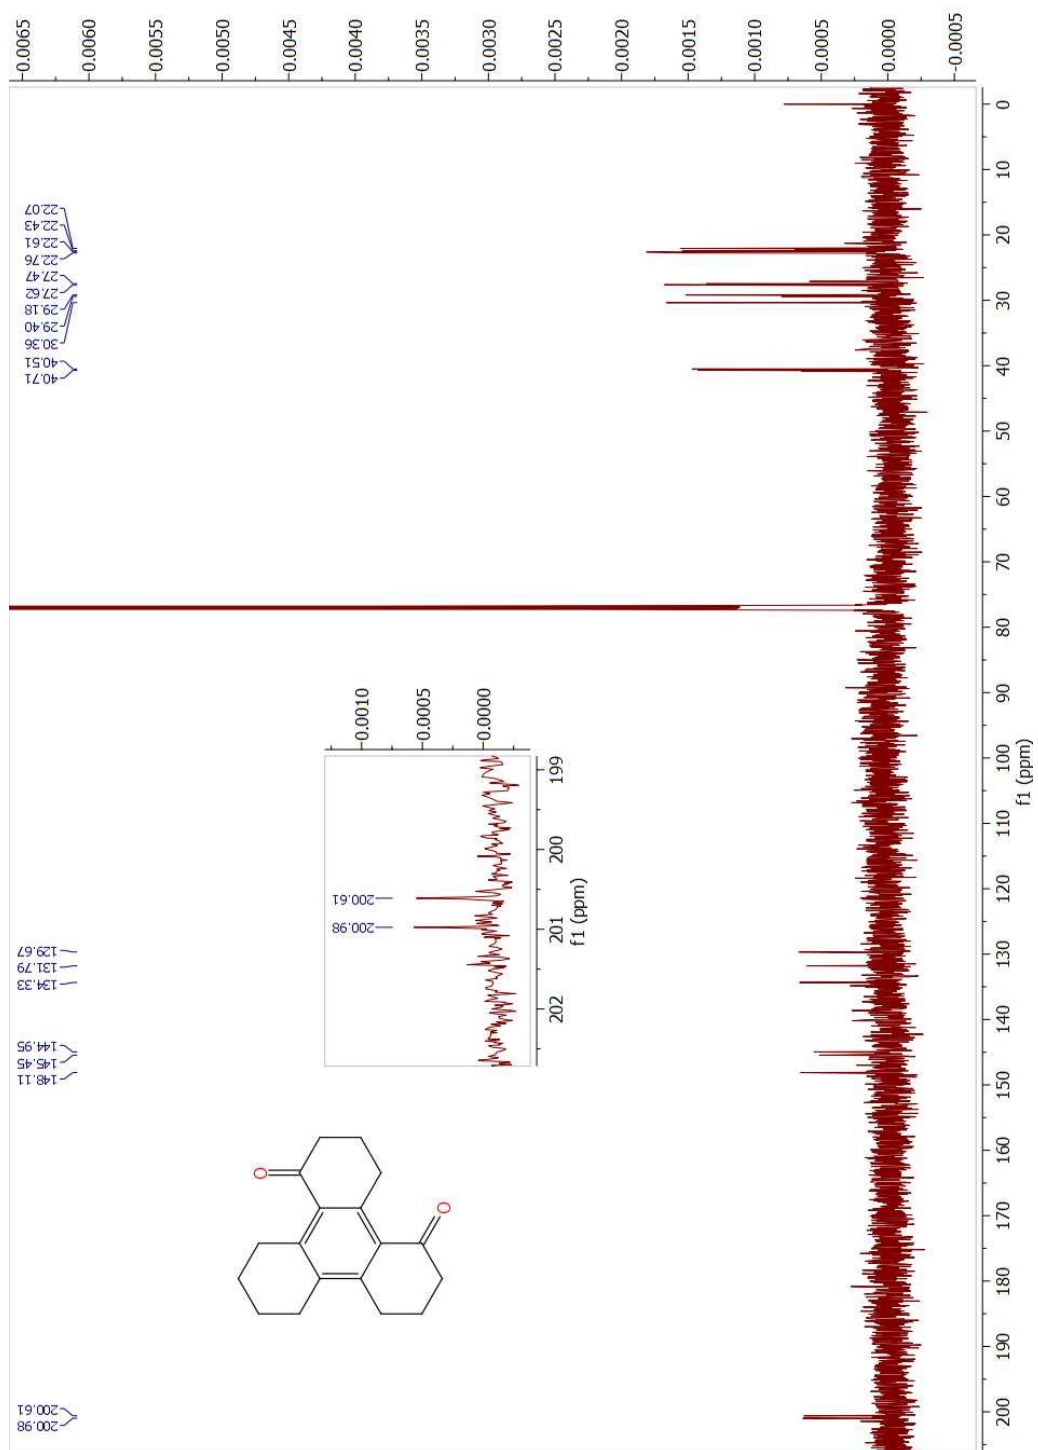

# HRMS of 3,4,7,8,9,10,11,12-octahydrotriphenylene-1,5(2H,6H)-dione (5)

Monoisotopic Mass, Even Electron Ions

9 formula(e) evaluated with 1 results within limits (up to 50 best isotopic matches for each mass)

Elements Used:

C: 11-25 H: 10-30 O: 0-4

Sample Name : GB027

Test Name : HRMS-1

020320-GB027 23 (0.237)

IITRPR

XEVO G2-XS QTOF

1: TOF MS ES+  
5.55e+007

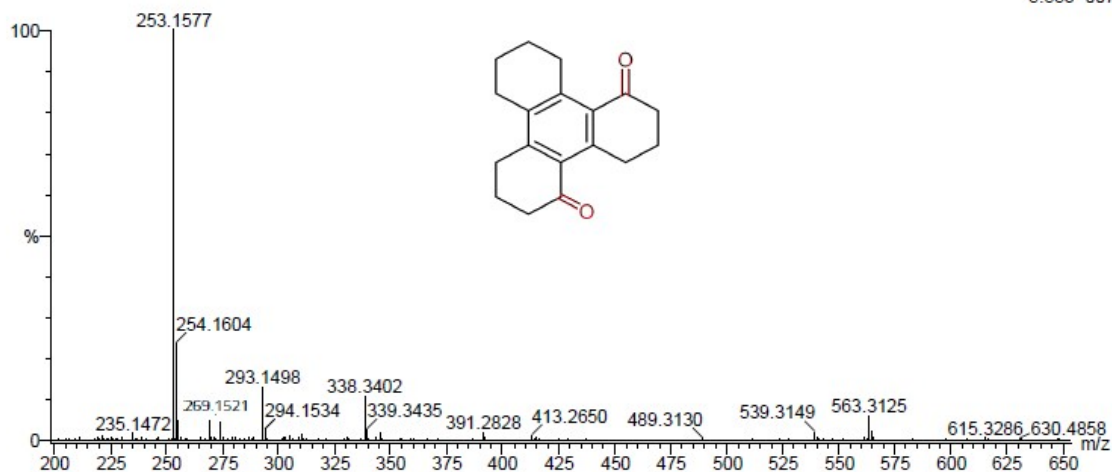

Minimum: -1.5  
Maximum: 5.0 20.0 50.0

| Mass     | Calc. Mass | mDa  | PPM  | DBE | i-FIT  | Norm | Conf (%) | Formula    |
|----------|------------|------|------|-----|--------|------|----------|------------|
| 269.1521 | 269.1542   | -2.1 | -7.8 | 8.5 | 1519.8 | n/a  | n/a      | C18 H21 O2 |

**<sup>1</sup>H NMR of 3,4,7,8,11,12-hexahydrotriphenylene-1,5,9(2H,6H,10H)-trione (6)**

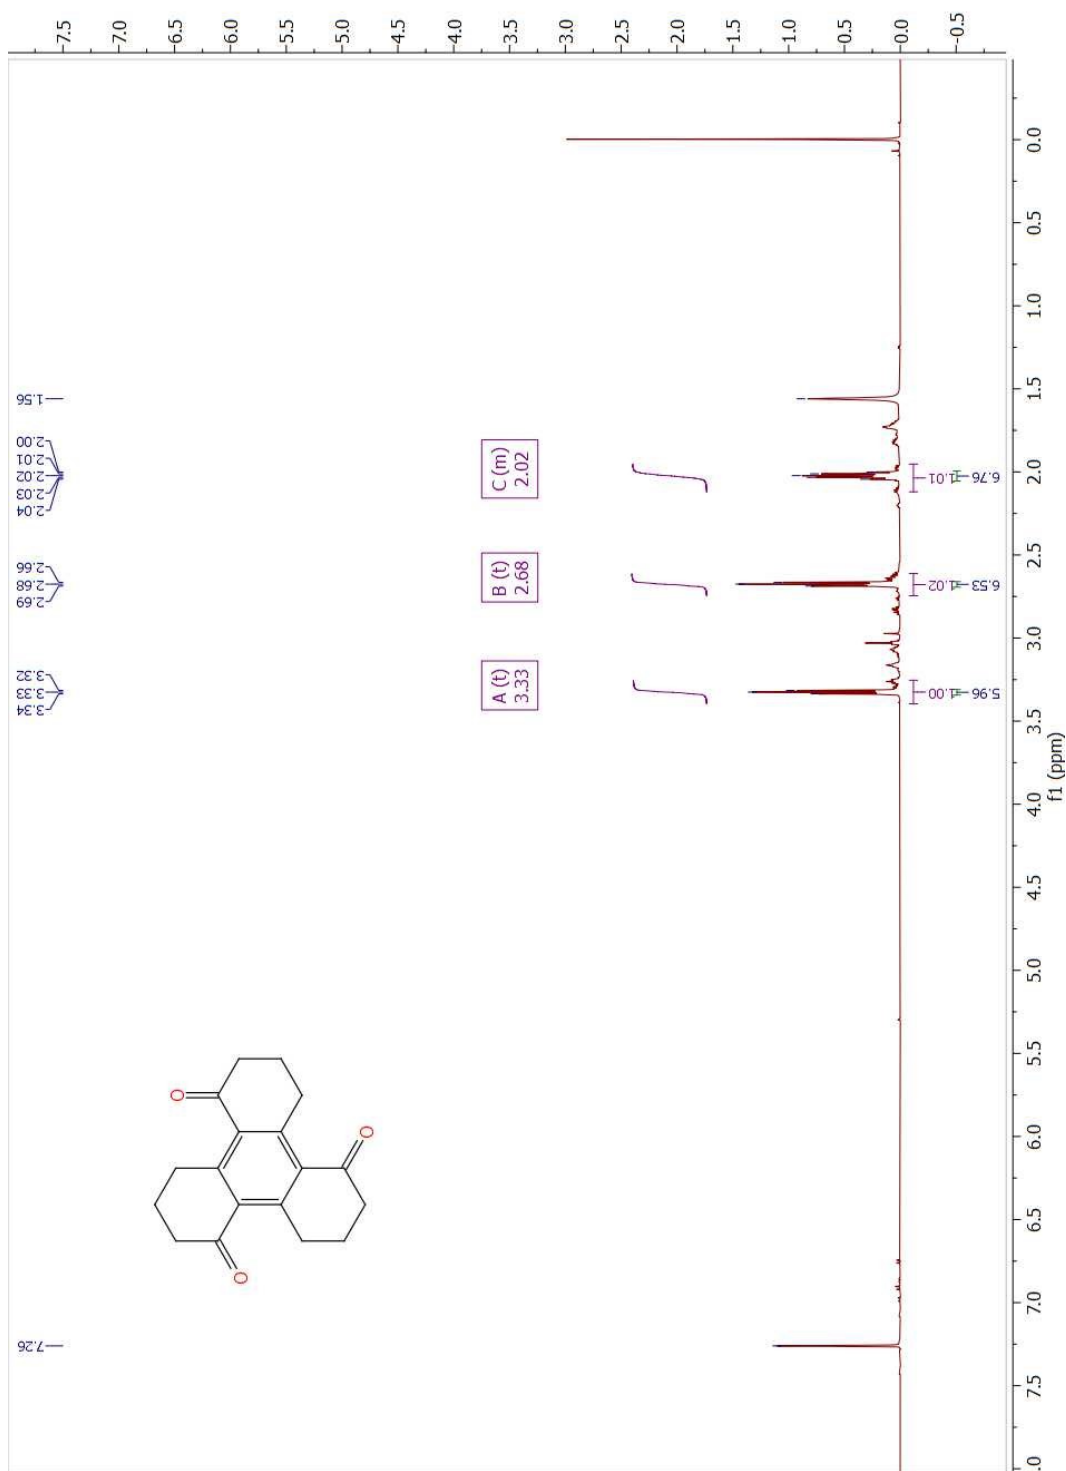

**$^{13}\text{C}$  NMR of 3,4,7,8,11,12-hexahydrotriphenylene-1,5,9(2H,6H,10H)-trione (6)**

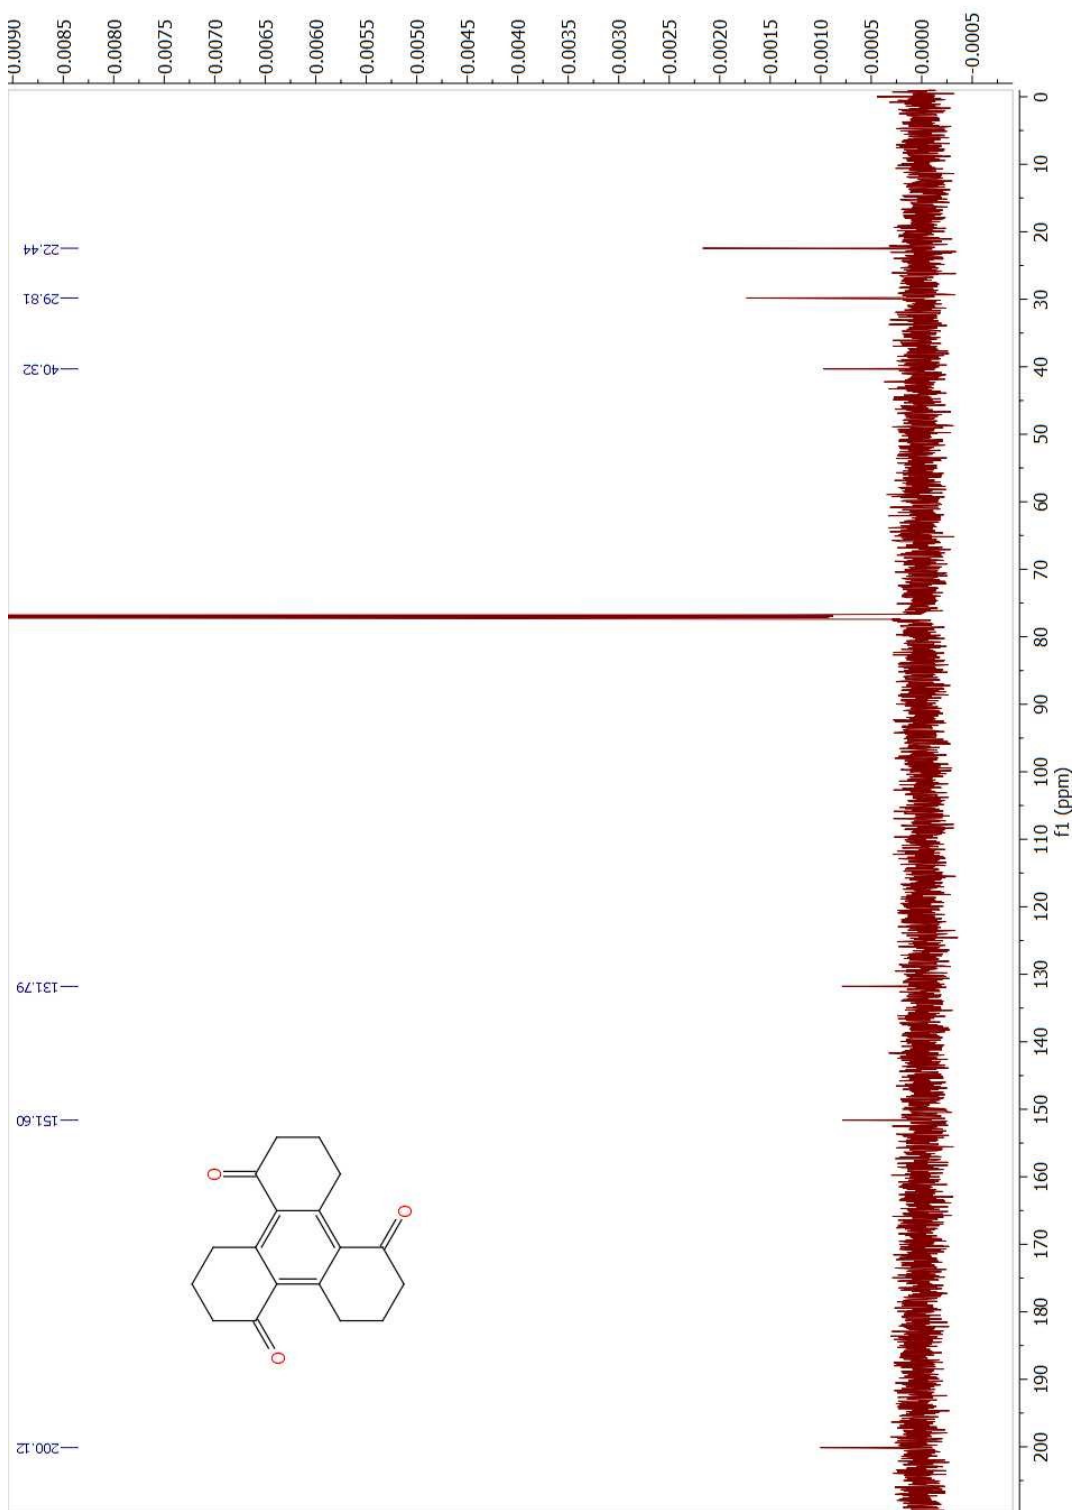

# HRMS of 3,4,7,8,11,12-hexahydrotriphenylene-1,5,9(2H,6H,10H)-trione (6)

Monoisotopic Mass, Even Electron Ions

8 formula(e) evaluated with 1 results within limits (up to 50 best isotopic matches for each mass)

Elements Used:

C: 11-25 H: 10-30 O: 0-4

Sample Name : GB028  
Test Name : HRMS-1  
020320-GB028 21 (0.220)

IITRPR

XEVO G2-XS QTOF

1: TOF MS ES+  
7.35e+007

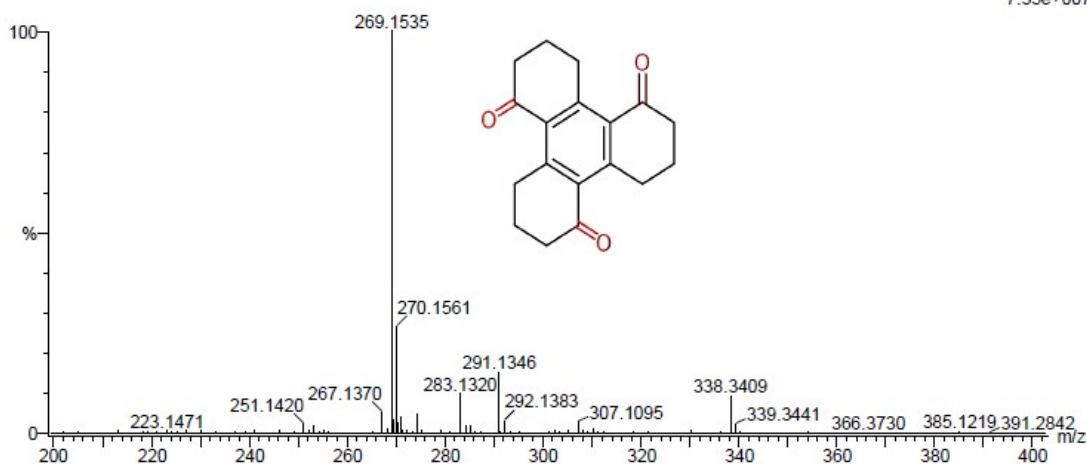

Minimum: -1.5  
Maximum: 5.0 20.0 50.0

| Mass     | Calc. Mass | mDa  | PPM  | DBE | i-FIT  | Norm | Conf(%) | Formula    |
|----------|------------|------|------|-----|--------|------|---------|------------|
| 283.1320 | 283.1334   | -1.4 | -4.9 | 9.5 | 1622.7 | n/a  | n/a     | C18 H19 O3 |

SECTION 3 OPTIMIZED ATOMIC COORDINATES OF COMPOUNDS IN  
ANGSTROM (Å)

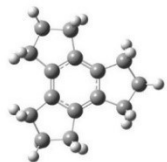

**Compound 1**

|   |             |             |             |
|---|-------------|-------------|-------------|
| C | -0.41011300 | 1.33955300  | -0.07648900 |
| C | 0.94764000  | 1.03178000  | -0.07642300 |
| C | 1.36541600  | -0.31483900 | -0.07703300 |
| C | 0.41987400  | -1.33671400 | -0.07729000 |
| C | -0.95529400 | -1.02504000 | -0.07748900 |
| C | -1.36772400 | 0.30465100  | -0.07736900 |
| C | -2.77308800 | 0.87624500  | -0.08960200 |
| C | -2.56173200 | 2.36966500  | 0.29580800  |
| C | -1.08886700 | 2.69651500  | -0.08778200 |
| C | 2.14504100  | 1.96351300  | -0.08799200 |
| C | 3.33337000  | 1.03365800  | 0.29509400  |
| C | 2.87990200  | -0.40519000 | -0.08906300 |
| C | 0.62758000  | -2.83964700 | -0.08869100 |
| C | -0.77136800 | -3.40286400 | 0.29724800  |
| C | -1.79071200 | -2.29157200 | -0.08887300 |
| H | -3.44895300 | 0.36447100  | 0.59947700  |
| H | -3.21781400 | 0.78948500  | -1.08815000 |
| H | -3.27717500 | 3.03214500  | -0.19217000 |
| H | -2.68820900 | 2.48566300  | 1.37491600  |
| H | -0.63194000 | 3.40920100  | 0.60275500  |
| H | -1.03550300 | 3.14781900  | -1.08570600 |
| H | 2.04012700  | 2.80343500  | 0.60271000  |
| H | 2.29100600  | 2.39389700  | -1.08590200 |
| H | 4.26408600  | 1.32263400  | -0.19391500 |
| H | 3.49853200  | 1.08447700  | 1.37400900  |
| H | 3.26881400  | -1.15771700 | 0.60088000  |
| H | 3.24372800  | -0.67646900 | -1.08727000 |
| H | 1.40877500  | -3.16868900 | 0.60047900  |
| H | 0.92495800  | -3.18198900 | -1.08708300 |
| H | -0.98706000 | -4.35469200 | -0.18894200 |
| H | -0.80889500 | -3.56822000 | 1.37668100  |
| H | -2.63749600 | -2.25149800 | 0.60022500  |

|   |             |             |             |
|---|-------------|-------------|-------------|
| H | -2.20653000 | -2.47223900 | -1.08731000 |
|---|-------------|-------------|-------------|

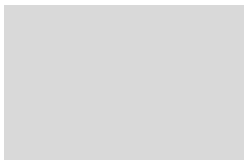

## Compound 2

|   |             |             |             |
|---|-------------|-------------|-------------|
| C | -0.58502600 | -1.53909100 | 0.15107100  |
| C | -1.69806200 | -0.57869100 | 0.78317400  |
| C | -1.52600100 | 0.77667700  | 0.02509700  |
| O | -0.24542500 | 0.68316200  | -0.68189400 |
| C | 0.07384700  | -0.69567000 | -1.00236800 |
| C | -1.59958200 | 2.07665200  | 0.83195200  |
| C | -3.12144400 | 2.33298400  | 0.98910500  |
| C | -3.74016200 | 1.86341200  | -0.35131000 |
| C | -2.69905100 | 0.96317800  | -0.96892300 |
| O | -2.70587500 | 0.54250400  | -2.13462900 |
| C | 0.30313900  | -1.96335800 | 1.33435200  |
| C | 0.08564500  | -0.90332800 | 2.43106400  |
| C | -1.41254600 | -0.57558500 | 2.29590500  |
| C | 1.57735700  | -0.81435600 | -1.25947700 |
| C | 2.49421000  | 0.02474600  | -0.35829100 |
| C | 3.97149700  | -0.09036700 | -0.80107500 |
| O | -3.02975000 | -1.08047600 | 0.50653700  |
| O | -1.22618500 | -2.70835700 | -0.41220100 |
| O | -0.57237600 | -1.10010600 | -2.24358500 |
| C | 4.91233600  | 0.69878400  | 0.08106800  |
| O | 5.80816600  | 0.22248300  | 0.76311800  |
| O | 4.70263300  | 2.07552700  | 0.10609700  |
| H | -1.06480100 | 2.02842900  | 1.77702200  |
| H | -1.13960900 | 2.86519000  | 0.23109700  |
| H | -3.33607300 | 3.37830000  | 1.20444400  |
| H | -3.51816200 | 1.73811600  | 1.81270000  |
| H | -4.67395400 | 1.31429000  | -0.22968000 |
| H | -3.93717100 | 2.68982900  | -1.03844300 |
| H | -0.08068600 | -2.92754500 | 1.67181800  |
| H | 1.34485000  | -2.11229000 | 1.06004500  |
| H | 0.69539200  | -0.01518600 | 2.24547600  |
| H | 0.34328000  | -1.27482800 | 3.42260800  |
| H | -2.00915700 | -1.38615900 | 2.71904400  |

|   |             |             |             |
|---|-------------|-------------|-------------|
| H | -1.71283900 | 0.34080300  | 2.79984700  |
| H | 1.71835600  | -0.50669900 | -2.29646700 |
| H | 1.84679100  | -1.87267300 | -1.21394700 |
| H | 2.41925100  | -0.28068000 | 0.68584300  |
| H | 2.15809600  | 1.06200900  | -0.40097700 |
| H | 4.07060500  | 0.25462400  | -1.83595200 |
| H | 4.29934700  | -1.12767900 | -0.76980000 |
| H | -2.91353600 | -1.99124700 | 0.14641700  |
| H | -1.21611800 | -2.58172400 | -1.39207300 |
| H | -1.33607500 | -0.49386700 | -2.44060400 |
| H | 3.97577300  | 2.36517600  | -0.47401900 |

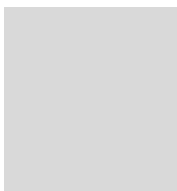

### Compound 3

|   |             |             |             |
|---|-------------|-------------|-------------|
| C | -1.22839100 | 0.69637700  | 0.02980500  |
| C | -0.00429900 | 1.41209300  | 0.02106400  |
| C | 1.21427400  | 0.71372300  | -0.01483900 |
| C | 1.22128600  | -0.70168900 | 0.01485200  |
| C | 0.00968400  | -1.41208100 | -0.02103200 |
| C | -1.22145400 | -0.70853800 | -0.02983100 |
| C | -2.52536200 | -1.49986900 | -0.08305700 |
| C | -3.76421400 | -0.65834800 | -0.41849300 |
| C | -3.77051000 | 0.62104800  | 0.41848100  |
| C | -2.54003300 | 1.47477000  | 0.08304200  |
| C | -0.03600700 | 2.93823700  | 0.02766800  |
| C | 1.31980200  | 3.60523700  | 0.30108500  |
| C | 2.42025100  | 2.92198500  | -0.51308700 |
| C | 2.54678100  | 1.45454400  | -0.08357400 |
| C | 2.56108600  | -1.42923700 | 0.08361000  |
| C | 2.44919000  | -2.89787100 | 0.51302000  |
| C | 1.35553800  | -3.59194700 | -0.30114700 |
| C | -0.00680900 | -2.93846500 | -0.02758200 |
| H | -2.43854300 | -2.30411200 | -0.81696200 |
| H | -2.68440200 | -2.00121700 | 0.88103200  |
| H | -3.75587600 | -0.39465700 | -1.48190800 |
| H | -4.66813200 | -1.24820000 | -0.24582100 |



|   |             |             |             |
|---|-------------|-------------|-------------|
| H | -4.68021800 | 1.20194000  | 0.24583200  |
| H | -3.75955300 | 0.35744400  | 1.48189500  |
| H | -2.70403700 | 1.97455700  | -0.88102800 |
| H | -2.46112600 | 2.27979000  | 0.81697300  |
| H | -0.75601100 | 3.29156600  | 0.76946000  |
| H | -0.41807800 | 3.29172100  | -0.93933200 |
| H | 1.25836300  | 4.67117200  | 0.06709300  |
| H | 1.56196100  | 3.52881300  | 1.36692000  |
| H | 3.37954600  | 3.42971500  | -0.38345000 |
| H | 2.17249700  | 2.97706300  | -1.57884700 |
| H | 3.21853300  | 0.93496800  | -0.77086900 |
| H | 3.04005500  | 1.41669600  | 0.89703300  |
| H | 3.22757200  | -0.90299900 | 0.77096000  |
| H | 3.05400200  | -1.38639500 | -0.89696800 |
| H | 3.41349000  | -3.39599800 | 0.38327900  |
| H | 2.20207300  | -2.95550600 | 1.57879400  |
| H | 1.30471300  | -4.65845900 | -0.06722700 |
| H | 1.59687100  | -3.51305300 | -1.36699000 |
| H | -0.72337600 | -3.29892600 | -0.76926400 |
| H | -0.38520700 | -3.29572200 | 0.93948000  |

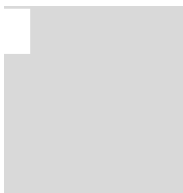

#### Compound 4

|   |             |             |             |
|---|-------------|-------------|-------------|
| C | -0.52106800 | 1.35639000  | -0.06217600 |
| C | -1.51423700 | 0.34278500  | -0.05671300 |
| C | -1.14647200 | -1.01189700 | 0.02423400  |
| C | 0.21846000  | -1.36644800 | 0.00838200  |
| C | 1.21637700  | -0.36010500 | 0.00608000  |
| C | 0.84289000  | 1.01836300  | 0.01471400  |
| C | 1.89780300  | 2.11360200  | 0.14026300  |
| C | 1.33509000  | 3.48207100  | 0.54139700  |
| C | 0.14245700  | 3.83272400  | -0.34621100 |
| C | -0.97976000 | 2.81122200  | -0.12672200 |
| C | -2.98209000 | 0.75098100  | -0.11084200 |
| C | -3.96471800 | -0.40336600 | -0.35157000 |

|   |             |             |             |
|---|-------------|-------------|-------------|
| C | -3.59270100 | -1.60349200 | 0.52041400  |
| C | -2.19901400 | -2.11213700 | 0.12960700  |
| C | 0.57883100  | -2.84754700 | 0.01002900  |
| C | 2.00824900  | -3.14219000 | -0.45161400 |
| C | 2.98195700  | -2.21934400 | 0.28368800  |
| C | 2.64965000  | -0.76785200 | 0.00126600  |
| O | 3.58649400  | 0.02746500  | -0.23216200 |
| H | 2.66099200  | 1.80247900  | 0.85128900  |
| H | 2.43769800  | 2.20438600  | -0.80644000 |
| H | 1.01799300  | 3.46801600  | 1.59057000  |
| H | 2.12416400  | 4.23339400  | 0.45964000  |
| H | -0.23176900 | 4.83858400  | -0.14004400 |
| H | 0.45876300  | 3.82022500  | -1.39480100 |
| H | -1.51003100 | 3.05866400  | 0.80210500  |
| H | -1.72053900 | 2.92373800  | -0.92222900 |
| H | -3.12450200 | 1.50481500  | -0.88806700 |
| H | -3.24241800 | 1.25296900  | 0.83018100  |
| H | -4.98328700 | -0.06515900 | -0.14691600 |
| H | -3.93649700 | -0.70141700 | -1.40533600 |
| H | -4.32244100 | -2.40984300 | 0.41514800  |
| H | -3.59771100 | -1.30503200 | 1.57436900  |
| H | -1.87305200 | -2.85980100 | 0.85618100  |
| H | -2.27511700 | -2.64235400 | -0.82887700 |
| H | -0.12442700 | -3.39729700 | -0.61731100 |
| H | 0.44648500  | -3.24534300 | 1.02579000  |
| H | 2.25408600  | -4.19095500 | -0.27163400 |
| H | 2.09247100  | -2.97536800 | -1.52988100 |
| H | 4.01875100  | -2.38155800 | -0.00617600 |
| H | 2.90821300  | -2.39541700 | 1.36438300  |

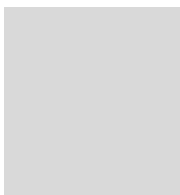

### Compound 5

|   |             |             |             |
|---|-------------|-------------|-------------|
| C | -0.41806600 | -1.50391300 | -0.04876600 |
| C | 0.95659500  | -1.17812700 | -0.04507100 |
| C | 1.37804100  | 0.17155500  | 0.06052600  |
| C | 0.41406000  | 1.21743200  | 0.00466100  |

|   |             |             |             |
|---|-------------|-------------|-------------|
| C | -0.96333300 | 0.88411600  | -0.01104000 |
| C | -1.38339200 | -0.48136100 | 0.03350400  |
| C | -2.85444700 | -0.84112900 | 0.20193500  |
| C | -3.09653400 | -2.28557800 | 0.65154000  |
| C | -2.32201800 | -3.23870800 | -0.25621600 |
| C | -0.81709900 | -2.97768000 | -0.11441300 |
| C | 1.98345200  | -2.29713300 | -0.12373100 |
| C | 3.34170600  | -1.82750800 | -0.65016900 |
| C | 3.83396400  | -0.66315700 | 0.20109700  |
| C | 2.82154100  | 0.46334300  | 0.29862100  |
| C | 0.86361900  | 2.67271500  | -0.04214200 |
| C | -0.20257100 | 3.64425700  | -0.55007800 |
| C | -1.51787600 | 3.39610600  | 0.18911000  |
| C | -1.97879700 | 1.98156700  | -0.06932200 |
| O | -3.18016500 | 1.77244400  | -0.34216600 |
| O | 3.23636200  | 1.59440800  | 0.63511400  |
| H | -3.31737200 | -0.14756800 | 0.90184800  |
| H | -3.37932200 | -0.65757000 | -0.73912000 |
| H | -2.77253100 | -2.42043700 | 1.68965700  |
| H | -4.16810800 | -2.49503500 | 0.62400100  |
| H | -2.53487400 | -4.28412200 | -0.02146500 |
| H | -2.63365300 | -3.07641700 | -1.29342100 |
| H | -0.45043800 | -3.48461300 | 0.78649600  |
| H | -0.29948200 | -3.45557100 | -0.95004700 |
| H | 1.60875800  | -3.10000800 | -0.75633000 |
| H | 2.11499800  | -2.74137900 | 0.87260600  |
| H | 4.05824000  | -2.65122400 | -0.63494800 |
| H | 3.23977800  | -1.51195300 | -1.69300400 |
| H | 4.76439300  | -0.22989900 | -0.16656600 |
| H | 4.03723200  | -1.00935500 | 1.22250000  |
| H | 1.76540600  | 2.75717100  | -0.64353000 |
| H | 1.18344900  | 2.97116200  | 0.96109200  |
| H | 0.13774800  | 4.67122200  | -0.40478800 |
| H | -0.35730100 | 3.50960700  | -1.62543500 |
| H | -2.31688000 | 4.06763200  | -0.12003100 |
| H | -1.36268700 | 3.53275900  | 1.26662700  |

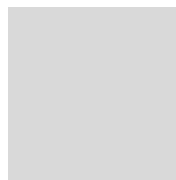

**Compound 6**

|   |             |             |             |
|---|-------------|-------------|-------------|
| C | 1.25928700  | 0.66426100  | -0.00260100 |
| C | 0.05698200  | 1.42258800  | -0.04784400 |
| C | -1.18763800 | 0.75982400  | 0.08586200  |
| C | -1.25433800 | -0.66054100 | 0.05550700  |
| C | -0.05344200 | -1.41012000 | -0.02018500 |
| C | 1.20994200  | -0.75245100 | 0.01951100  |
| C | 2.49683000  | -1.56353000 | 0.09252000  |
| C | 3.71643800  | -0.77701000 | 0.57483700  |
| C | 3.82643800  | 0.53365200  | -0.20681200 |
| C | 2.58624800  | 1.35715100  | 0.03579100  |
| C | 0.07729600  | 2.92669200  | -0.27121000 |
| C | -1.22950500 | 3.44288500  | -0.87918300 |
| C | -2.39372700 | 3.05959500  | 0.02465300  |
| C | -2.41375300 | 1.57884800  | 0.33865800  |
| C | -2.60446000 | -1.36478900 | 0.08083000  |
| C | -2.58224700 | -2.79385000 | -0.46399300 |
| C | -1.43965700 | -3.57580100 | 0.18669600  |
| C | -0.12899100 | -2.90168900 | -0.13501900 |
| O | 0.84049800  | -3.59283100 | -0.51138100 |
| O | -3.44151900 | 1.08763300  | 0.85146300  |
| O | 2.69508100  | 2.57471100  | 0.29082800  |
| H | 2.34293500  | -2.43851300 | 0.71952500  |
| H | 2.69786900  | -1.97973800 | -0.89908200 |
| H | 3.63063700  | -0.55871200 | 1.64389400  |
| H | 4.61520600  | -1.38232400 | 0.44616400  |
| H | 4.68756700  | 1.13368000  | 0.08109800  |
| H | 3.91178000  | 0.31439500  | -1.27829000 |
| H | 0.92073600  | 3.18896300  | -0.90338200 |
| H | 0.27845000  | 3.43916700  | 0.67503700  |
| H | -1.17592500 | 4.52547500  | -1.00639200 |
| H | -1.36992800 | 3.01121700  | -1.87533600 |
| H | -3.36710500 | 3.31683600  | -0.39600500 |
| H | -2.32204200 | 3.59578900  | 0.97883900  |
| H | -3.33981700 | -0.77002400 | -0.45498900 |
| H | -2.96650600 | -1.37062500 | 1.11356600  |
| H | -3.54220800 | -3.27480200 | -0.26873900 |
| H | -2.44681800 | -2.78434100 | -1.55009500 |
| H | -1.37727400 | -4.60693600 | -0.15576000 |
| H | -1.58027000 | -3.58990200 | 1.27456500  |

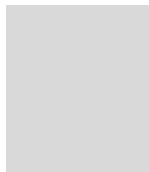

## Compound 7

|   |             |             |             |
|---|-------------|-------------|-------------|
| C | 0.58015400  | -1.47329400 | 0.07604800  |
| C | -0.83163500 | -1.34694700 | 0.05152300  |
| C | -1.44417700 | -0.07681300 | -0.01564500 |
| C | -0.62066100 | 1.07991300  | 0.03764400  |
| C | 0.79991800  | 0.94649000  | 0.02199300  |
| C | 1.40775600  | -0.33198900 | 0.01348100  |
| C | 2.92272600  | -0.48472200 | -0.09083900 |
| C | 3.37515600  | -1.88005300 | -0.53462100 |
| C | 2.69503600  | -2.93745600 | 0.33333200  |
| C | 1.17536300  | -2.87600400 | 0.13426000  |
| C | -1.66493600 | -2.62461700 | 0.08297500  |
| C | -3.17100800 | -2.41692500 | 0.27843800  |
| C | -3.64487900 | -1.26077900 | -0.59907500 |
| C | -2.95859500 | 0.03720300  | -0.15965200 |
| C | -1.22459900 | 2.43868700  | 0.17841100  |
| C | -0.32390500 | 3.65840400  | 0.16908500  |
| C | 0.99441000  | 3.42048000  | -0.57049400 |
| C | 1.64198500  | 2.17849300  | -0.01257100 |
| O | 2.82277000  | 2.20895200  | 0.38835100  |
| O | -2.44809100 | 2.62210700  | 0.35561600  |
| H | 3.32276300  | 0.26840500  | -0.76800000 |
| H | 3.37414900  | -0.24748300 | 0.87597700  |
| H | 3.11816300  | -2.04597100 | -1.58695200 |
| H | 4.46275700  | -1.94719500 | -0.45945500 |
| H | 3.05204600  | -3.94272800 | 0.09804100  |
| H | 2.94221000  | -2.75130300 | 1.38375700  |
| H | 0.91450200  | -3.40283400 | -0.79249300 |
| H | 0.68963600  | -3.44176800 | 0.93268200  |
| H | -1.29115200 | -3.28082500 | 0.87190400  |
| H | -1.49861900 | -3.17307100 | -0.85318700 |
| H | -3.70047000 | -3.34395900 | 0.04667500  |
| H | -3.38293500 | -2.18370600 | 1.32719600  |
| H | -4.72768400 | -1.13213500 | -0.53612100 |
| H | -3.41149500 | -1.47720300 | -1.64780900 |
| H | -3.19556600 | 0.83802600  | -0.85725000 |
| H | -3.38772800 | 0.37421600  | 0.78808100  |
| H | -0.89439700 | 4.48366700  | -0.25508900 |

|   |             |            |             |
|---|-------------|------------|-------------|
| H | -0.11667700 | 3.92508600 | 1.21154800  |
| H | 1.68405700  | 4.25440900 | -0.45840600 |
| H | 0.80036900  | 3.27747900 | -1.63859400 |

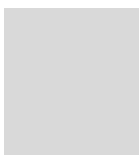

### Compound 8

|   |             |             |             |
|---|-------------|-------------|-------------|
| C | 0.70574200  | 1.16050400  | 0.03554400  |
| C | 1.40850000  | -0.08038800 | 0.02354600  |
| C | 0.70363900  | -1.30857700 | -0.00648200 |
| C | -0.70363400 | -1.30857900 | 0.00648000  |
| C | -1.40849800 | -0.08039200 | -0.02354400 |
| C | -0.70574400 | 1.16050100  | -0.03554500 |
| C | -1.47548800 | 2.47472700  | -0.14632400 |
| C | -0.60943600 | 3.69798800  | -0.45873100 |
| C | 0.60942200  | 3.69799300  | 0.45871700  |
| C | 1.47548000  | 2.47473300  | 0.14632000  |
| C | 2.90635100  | -0.12093300 | 0.04216600  |
| C | 3.57537200  | -1.43990500 | 0.36207200  |
| C | 2.90421300  | -2.56272000 | -0.43260500 |
| C | 1.42779500  | -2.65089500 | -0.03955200 |
| C | -1.42778800 | -2.65089900 | 0.03954400  |
| C | -2.90420700 | -2.56272900 | 0.43259800  |
| C | -3.57537000 | -1.43991000 | -0.36207000 |
| C | -2.90635000 | -0.12094000 | -0.04215600 |
| O | -3.61757900 | 0.87294600  | 0.21012100  |
| O | 3.61758200  | 0.87295600  | -0.21009600 |
| H | -2.25977800 | 2.37055900  | -0.89533000 |
| H | -2.01903400 | 2.64571800  | 0.78605600  |
| H | -0.27803500 | 3.67658900  | -1.50292200 |
| H | -1.20945400 | 4.60232300  | -0.33442600 |
| H | 1.20943600  | 4.60232900  | 0.33440800  |
| H | 0.27802000  | 3.67660000  | 1.50290900  |
| H | 2.01902800  | 2.64572300  | -0.78605900 |
| H | 2.25976700  | 2.37057300  | 0.89532900  |
| H | 4.63490900  | -1.33658400 | 0.13564500  |
| H | 3.47980300  | -1.64189500 | 1.43601600  |
| H | 3.39922000  | -3.51860100 | -0.25077500 |
| H | 2.99574400  | -2.35559000 | -1.50311500 |

|   |             |             |             |
|---|-------------|-------------|-------------|
| H | 0.91272500  | -3.32786300 | -0.72293400 |
| H | 1.35572600  | -3.11700400 | 0.95250500  |
| H | -0.91271600 | -3.32786800 | 0.72292400  |
| H | -1.35571800 | -3.11700300 | -0.95251400 |
| H | -3.39921100 | -3.51861000 | 0.25076100  |
| H | -2.99573800 | -2.35560700 | 1.50310900  |
| H | -4.63490500 | -1.33659300 | -0.13564000 |
| H | -3.47980200 | -1.64189300 | -1.43601600 |

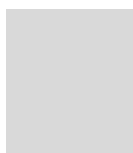

### Compound 9

|   |             |             |             |
|---|-------------|-------------|-------------|
| C | 0.26074300  | -1.42557600 | 0.02208300  |
| C | 1.50857700  | -0.75307300 | -0.01271500 |
| C | 1.54273000  | 0.65263400  | 0.05504500  |
| C | 0.33573000  | 1.39868900  | 0.01998700  |
| C | -0.89629900 | 0.72578800  | 0.01020100  |
| C | -0.92594500 | -0.68271900 | 0.10063200  |
| C | -2.17407200 | -1.40847300 | 0.48903300  |
| C | -2.38202800 | -2.80618200 | -0.05962300 |
| C | -1.13064900 | -3.37789300 | -0.74396500 |
| C | 0.14740600  | -2.94276500 | 0.00020400  |
| C | 2.79395300  | -1.56994000 | -0.08475100 |
| C | 4.05633700  | -0.74176300 | -0.36462300 |
| C | 4.06433500  | 0.51666700  | 0.50573300  |
| C | 2.86546400  | 1.40459200  | 0.14627900  |
| C | 0.38741100  | 2.92210600  | 0.02387900  |
| C | -0.90870900 | 3.60553800  | -0.44231500 |
| C | -2.14965700 | 2.94024300  | 0.18346700  |
| C | -2.15993300 | 1.48876200  | -0.22400000 |
| O | -3.12187200 | 0.98163400  | -0.82658600 |
| O | -2.95948600 | -0.92986200 | 1.32503500  |
| H | -3.22897300 | -2.76432200 | -0.75062900 |
| H | -2.69964700 | -3.43409000 | 0.77692900  |
| H | -1.19056500 | -4.46719300 | -0.78905900 |
| H | -1.06927300 | -3.01860500 | -1.77472600 |
| H | 0.12977400  | -3.33994500 | 1.02326500  |
| H | 1.01712600  | -3.38718700 | -0.48089100 |
| H | 2.69470200  | -2.33810300 | -0.85533300 |
| H | 2.92393800  | -2.11408700 | 0.85894700  |

|   |             |             |             |
|---|-------------|-------------|-------------|
| H | 4.94296700  | -1.35328000 | -0.18286400 |
| H | 4.08335100  | -0.45080600 | -1.42025700 |
| H | 4.99120400  | 1.07983000  | 0.37570500  |
| H | 4.01181500  | 0.23012600  | 1.56145000  |
| H | 2.77451500  | 2.20744700  | 0.88188500  |
| H | 3.06735300  | 1.90207700  | -0.81132700 |
| H | 1.21592200  | 3.27240800  | -0.59407400 |
| H | 0.61601100  | 3.25456200  | 1.04542800  |
| H | -0.87736500 | 4.66722500  | -0.18974100 |
| H | -0.98630700 | 3.54158200  | -1.53187100 |
| H | -3.07479600 | 3.40426800  | -0.15312600 |
| H | -2.10325600 | 3.01410000  | 1.27539700  |

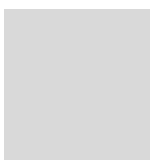

### Compound 10

|   |             |             |             |
|---|-------------|-------------|-------------|
| C | -0.25724400 | -1.51517300 | 0.07854500  |
| C | 1.11903400  | -1.19983000 | 0.03341900  |
| C | 1.53303000  | 0.15797000  | 0.09151600  |
| C | 0.57104900  | 1.21174000  | 0.01390800  |
| C | -0.79399600 | 0.87126300  | 0.00306200  |
| C | -1.19262500 | -0.47306900 | 0.13732500  |
| C | -2.59510200 | -0.84236600 | 0.52406900  |
| C | -3.18967100 | -2.07991200 | -0.11053100 |
| C | -2.11984000 | -3.00369000 | -0.72431200 |
| C | -0.80198000 | -2.93664300 | 0.07750000  |
| C | 2.14731300  | -2.31697300 | -0.04445600 |
| C | 3.48292500  | -1.85141600 | -0.63159700 |
| C | 3.99808900  | -0.66077700 | 0.17086400  |
| C | 2.98306000  | 0.46144700  | 0.27907600  |
| C | 0.97722700  | 2.67939000  | -0.04588600 |
| C | -0.11088900 | 3.61966400  | -0.58607600 |
| C | -1.48159500 | 3.32966800  | 0.05232200  |
| C | -1.84234300 | 1.90526500  | -0.26109100 |
| O | -2.91646600 | 1.59365000  | -0.80603100 |
| O | -3.18232700 | -0.22630900 | 1.42720600  |
| O | 3.39166400  | 1.60409900  | 0.57658500  |
| H | -3.90640600 | -1.74980400 | -0.86827600 |
| H | -3.76714300 | -2.59111400 | 0.66263700  |
| H | -2.48754800 | -4.03066700 | -0.75921400 |
| H | -1.91050500 | -2.70461600 | -1.75451700 |



|   |             |             |             |
|---|-------------|-------------|-------------|
| H | -0.97921600 | -3.27717400 | 1.10513800  |
| H | -0.08229800 | -3.63155600 | -0.35027400 |
| H | 1.75450600  | -3.13792900 | -0.64358900 |
| H | 2.31743400  | -2.73150100 | 0.95788400  |
| H | 4.20619000  | -2.66892400 | -0.61977200 |
| H | 3.34144800  | -1.56451100 | -1.67797600 |
| H | 4.91115700  | -0.23270300 | -0.24351100 |
| H | 4.24315200  | -0.97851900 | 1.19228100  |
| H | 1.88636800  | 2.79336800  | -0.63102100 |
| H | 1.26685700  | 2.99079900  | 0.96281800  |
| H | 0.18311200  | 4.65399300  | -0.39943200 |
| H | -0.19429800 | 3.50667700  | -1.67161600 |
| H | -2.26405000 | 3.98338700  | -0.32808700 |
| H | -1.42038400 | 3.45992300  | 1.13851000  |

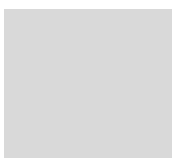

### Compound 11

|   |             |             |             |
|---|-------------|-------------|-------------|
| C | -0.13047800 | -1.57644800 | 0.00418400  |
| C | 1.23245400  | -1.18954400 | -0.02372800 |
| C | 1.58320500  | 0.17660600  | 0.03566400  |
| C | 0.54977000  | 1.16405400  | -0.03286600 |
| C | -0.80168300 | 0.76091100  | -0.03925000 |
| C | -1.13775000 | -0.59813500 | 0.06931800  |
| C | -2.52522800 | -0.99796400 | 0.44599900  |
| C | -2.99389900 | -2.39567300 | 0.09905100  |
| C | -1.93817800 | -3.21338900 | -0.65163400 |
| C | -0.55306400 | -3.03602600 | -0.00389300 |
| C | 2.29514600  | -2.28258400 | -0.08703800 |
| C | 3.72290000  | -1.77412700 | -0.32115100 |
| C | 3.98427500  | -0.55694200 | 0.56481600  |
| C | 3.04279600  | 0.58730000  | 0.17242900  |
| C | 0.85188800  | 2.62522700  | -0.11433900 |
| C | -0.28678600 | 3.63850600  | -0.07581400 |
| C | -1.63854800 | 3.09523100  | 0.42523100  |
| C | -1.87091300 | 1.78777900  | -0.27318600 |
| O | -2.78798900 | 1.59751700  | -1.08493400 |
| O | -3.24491600 | -0.23469300 | 1.11537700  |
| O | 2.01305400  | 3.06681300  | -0.23930600 |
| H | -3.91858200 | -2.30089600 | -0.47530400 |

|   |             |             |             |
|---|-------------|-------------|-------------|
| H | -3.26991500 | -2.88568900 | 1.03846800  |
| H | -2.21454400 | -4.26927700 | -0.66404100 |
| H | -1.88354200 | -2.88528800 | -1.69332500 |
| H | -0.57535000 | -3.42405400 | 1.02306100  |
| H | 0.17798500  | -3.64139200 | -0.53667000 |
| H | 2.03490700  | -2.98963100 | -0.87844800 |
| H | 2.26831600  | -2.85931400 | 0.84560600  |
| H | 4.43452300  | -2.57808400 | -0.12098900 |
| H | 3.85046300  | -1.49043200 | -1.37105300 |
| H | 5.01783600  | -0.21635400 | 0.47458900  |
| H | 3.83124900  | -0.82943300 | 1.61499400  |
| H | 3.12000700  | 1.40105500  | 0.89156200  |
| H | 3.37756000  | 1.03435400  | -0.76820200 |
| H | 0.05706700  | 4.48388400  | 0.51994800  |
| H | -0.40694700 | 4.01238700  | -1.09824200 |
| H | -2.45086000 | 3.78329300  | 0.20118200  |
| H | -1.60679600 | 2.92906700  | 1.50501200  |

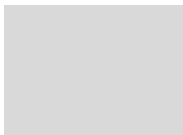

### Compound 12

|   |             |             |             |
|---|-------------|-------------|-------------|
| C | -1.07681800 | -1.48790500 | -0.66533200 |
| C | -1.71496300 | -1.00525600 | 0.70117600  |
| C | -1.95401900 | 0.52522600  | 0.45401300  |
| O | -0.73011100 | 0.89662900  | -0.30866200 |
| C | -0.36478900 | -0.18028200 | -1.22001500 |
| C | 1.15879500  | -0.13685500 | -1.42940700 |
| C | 2.02520100  | 0.29522500  | -0.23545800 |
| C | 3.52015900  | 0.30798200  | -0.59712800 |
| C | 4.40258500  | 0.76956800  | 0.58518100  |
| O | -2.91786600 | -1.72844900 | 0.99580400  |
| O | -2.18004900 | -1.86354900 | -1.54378200 |
| O | -1.00829400 | 0.07179200  | -2.50697900 |
| C | -2.00167200 | 1.42120100  | 1.70738800  |
| C | -2.10854600 | 2.92179100  | 1.37220000  |
| C | -3.31093400 | 3.22856400  | 0.46611500  |
| C | -3.27496800 | 2.34537900  | -0.80676300 |
| C | -3.19060500 | 0.89072500  | -0.40571300 |
| O | -4.10471700 | 0.09508700  | -0.66908600 |
| C | -0.25626200 | -2.78759400 | -0.55852000 |

|   |             |             |             |
|---|-------------|-------------|-------------|
| C | 0.58582300  | -2.99171300 | 0.70883600  |
| C | -0.25207300 | -2.68601200 | 1.95808300  |
| C | -0.79120000 | -1.25025600 | 1.90864400  |
| C | 5.86572300  | 0.90503800  | 0.22659300  |
| O | 6.50982000  | 1.94265000  | 0.27321900  |
| O | 6.49550600  | -0.26281400 | -0.19698800 |
| H | 1.34603600  | 0.57413100  | -2.24091200 |
| H | 1.47979500  | -1.10835100 | -1.80913500 |
| H | 1.87001100  | -0.36583500 | 0.61744600  |
| H | 1.71532100  | 1.29049100  | 0.08504200  |
| H | 3.68929900  | 0.97352400  | -1.44887100 |
| H | 3.82094200  | -0.69352600 | -0.92592300 |
| H | 4.29895200  | 0.06408900  | 1.41674000  |
| H | 4.07110400  | 1.74327700  | 0.94022700  |
| H | -3.47890300 | -1.71692500 | 0.19315700  |
| H | -2.28127800 | -1.19759500 | -2.25095800 |
| H | -0.72332700 | 0.92889200  | -2.86620500 |
| H | -1.11084700 | 1.24515700  | 2.30617700  |
| H | -2.86390000 | 1.10320400  | 2.30230900  |
| H | -2.18462000 | 3.49051300  | 2.30227300  |
| H | -1.18744700 | 3.23982700  | 0.87789300  |
| H | -3.32029700 | 4.28220200  | 0.17996600  |
| H | -4.24327000 | 3.03696400  | 1.00637400  |
| H | -4.16710400 | 2.48192000  | -1.41553600 |
| H | -2.39673100 | 2.61204300  | -1.39782300 |
| H | 0.33795700  | -2.90916300 | -1.46709300 |
| H | -1.01351100 | -3.57202000 | -0.59170000 |
| H | 0.93855800  | -4.02627200 | 0.73008600  |
| H | 1.48161800  | -2.36394000 | 0.70167200  |
| H | 0.34586700  | -2.81995400 | 2.86334000  |
| H | -1.09360700 | -3.37896100 | 2.01912800  |
| H | -1.37184700 | -1.04081700 | 2.80746500  |
| H | 0.04642400  | -0.55019000 | 1.88703300  |
| H | 5.91188000  | -1.04242900 | -0.18971700 |

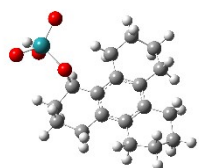

**Intermediate Ru(VI) species**

|    |             |             |             |
|----|-------------|-------------|-------------|
| C  | -3.31102700 | 0.27417900  | -0.11594200 |
| C  | -2.86454500 | -1.06772100 | -0.06362600 |
| C  | -1.51230300 | -1.35197000 | 0.27528000  |
| C  | -0.61771300 | -0.28476600 | 0.52431100  |
| C  | -1.04551000 | 1.06849100  | 0.40748700  |
| C  | -2.39852000 | 1.34680400  | 0.11477300  |
| C  | -0.03230600 | 2.19837500  | 0.61097000  |
| C  | -0.49965900 | 3.55474200  | 0.05279000  |
| C  | -1.92478100 | 3.85294800  | 0.54245200  |
| C  | -2.90513400 | 2.78823100  | 0.01319000  |
| C  | -1.07325800 | -2.81082900 | 0.41127700  |
| C  | 0.44455200  | -3.02388100 | 0.56584400  |
| C  | 1.04327500  | -1.97307700 | 1.51099900  |
| C  | 0.81789800  | -0.56946500 | 0.93799400  |
| C  | -4.77054300 | 0.60223400  | -0.43916300 |
| C  | -5.73298200 | -0.59457900 | -0.32626600 |
| C  | -5.13354900 | -1.81762800 | -1.03491600 |
| C  | -3.81904100 | -2.23057800 | -0.34666800 |
| O  | 1.60969500  | -0.44846800 | -0.33911000 |
| Ru | 3.45208600  | -0.00589200 | -0.46678300 |
| O  | 3.50718500  | 0.29123000  | 1.43480400  |
| O  | 4.34408800  | -1.43649500 | -0.84465600 |
| O  | 3.58554200  | 1.52977000  | -1.25061400 |
| H  | 0.91930800  | 1.93029400  | 0.14147700  |
| H  | 0.17359400  | 2.31391500  | 1.68869400  |
| H  | -0.48516700 | 3.53076900  | -1.04718800 |
| H  | 0.19842300  | 4.34209900  | 0.36752400  |
| H  | -1.93321900 | 3.85369200  | 1.64340500  |
| H  | -2.25585700 | 4.84920600  | 0.21869700  |
| H  | -3.85638800 | 2.88805600  | 0.55228100  |
| H  | -3.14001600 | 3.00788500  | -1.04167000 |
| H  | -1.42290700 | -3.38683600 | -0.45516200 |
| H  | -1.59153500 | -3.24659300 | 1.28226700  |
| H  | 0.93551400  | -2.93606100 | -0.41214800 |
| H  | 0.63923600  | -4.03804500 | 0.93818900  |
| H  | 0.56214700  | -2.02496400 | 2.49976000  |
| H  | 2.11764000  | -2.13090400 | 1.66263200  |
| H  | 1.20091500  | 0.18413400  | 1.62940900  |
| H  | -5.12470400 | 1.40535000  | 0.21943600  |
| H  | -4.82583000 | 1.01374300  | -1.46110000 |
| H  | -5.90469700 | -0.83755300 | 0.73353100  |
| H  | -6.70710300 | -0.32554900 | -0.75703900 |
| H  | -5.83493700 | -2.66312100 | -1.02738500 |
| H  | -4.94048100 | -1.56699200 | -2.08909900 |

|   |             |             |             |
|---|-------------|-------------|-------------|
| H | -3.31447100 | -2.98072500 | -0.96899200 |
| H | -4.05555300 | -2.74327100 | 0.60105100  |
| H | 4.39308700  | 0.56336700  | 1.77178000  |

#### SECTION 4 REFERENCES ASSOCIATED WITH SI

1. J. Wei, X. Jia, J. Yu, X. Shi, C. Zhang and Z. Chen, *Chemical Communications*, 2009, 4714-4716.
2. M. Farina and G. Audisio, *Tetrahedron*, 1970, **26**, 1827-1837.
